# Supplementary material for: Slow RNAPII Transcription Elongation Rate, Low Levels of RNAPII Pausing, and Elevated Histone H1 Content at Promoters Associate with Higher m6A Deposition on Nascent mRNAs
Source: MDPI journal article supplement (doi:10.3390/genes13091652), 2022-09-14
Supplement: s1 [file s1]

Supplementary Table S1. Main distribution data (mean, median, SD) of the variables analyzed across slow, medium and fast rate genes.

(A) Elongation rates of slow, medium and fast rate categories (**Figure 1D**).

| Distribution statistics | mean     | median | SD        |
|-------------------------|----------|--------|-----------|
| WT slow                 | 1.741578 | 1.82   | 0.6204964 |
| WT medium               | 3.047892 | 3.06   | 0.1980922 |
| WT fast                 | 4.149014 | 3.7    | 1.098192  |
| H1-TKO slow             | 1.621007 | 1.58   | 0.5870089 |
| H1-TKO medium           | 3.189032 | 3.24   | 0.270798  |
| H1-TKO fast             | 4.276415 | 3.96   | 0.931213  |

(B) RNAPII levels at TSS and transcription elongation rate categories (**Figure 2C**).

| Distribution statistics | mean     | median   | SD       |
|-------------------------|----------|----------|----------|
| WT slow                 | 2.078333 | 1.796961 | 1.519135 |
| WT medium               | 2.910465 | 2.65276  | 1.573692 |
| WT fast                 | 3.096705 | 2.883417 | 1.808997 |
| H1-TKO slow             | 2.268346 | 1.949536 | 1.835134 |
| H1-TKO medium           | 3.173807 | 2.916454 | 1.704815 |
| H1-TKO fast             | 3.373803 | 3.149902 | 1.88342  |

(C) CheRNA levels and transcription elongation rate categories (**Figure 2D**).

| Distribution statistics | mean      | median    | SD       |
|-------------------------|-----------|-----------|----------|
| WT slow                 | 0.6778481 | 0.3967252 | 2.671459 |
| WT medium               | 1.33611   | 0.9492873 | 1.560947 |
| WT fast                 | 1.64832   | 1.23254   | 1.59928  |
| H1-TKO slow             | 0.6964565 | 0.4051067 | 2.879507 |
| H1-TKO medium           | 1.254151  | 0.8773069 | 1.424471 |
| H1-TKO fast             | 1.593306  | 1.214152  | 1.542872 |

(D) RNAPII pausing and transcription elongation rate categories (**Figure 2E**).

| <b>Distribution statistics</b> | <b>mean</b> | <b>median</b> | <b>SD</b> |
|--------------------------------|-------------|---------------|-----------|
| <b>WT slow</b>                 | 4.047321    | 3.601417      | 2.444012  |
| <b>WT medium</b>               | 4.729108    | 4.440732      | 2.10001   |
| <b>WT fast</b>                 | 4.494256    | 4.269058      | 2.02727   |
| <b>H1-TKO slow</b>             | 3.804525    | 3.476232      | 2.12269   |
| <b>H1-TKO medium</b>           | 4.547046    | 4.330952      | 1.977218  |
| <b>H1-TKO fast</b>             | 4.429188    | 4.234174      | 2.036129  |

(E) m6A levels on nascent RNAs and transcription elongation rate categories (**Figure 2F**).

| <b>Distribution statistics</b> | <b>mean</b> | <b>median</b> | <b>SD</b> |
|--------------------------------|-------------|---------------|-----------|
| <b>WT slow</b>                 | 1.171492    | 0.587628      | 12.37888  |
| <b>WT medium</b>               | 0.7106489   | 0.5421378     | 4.49058   |
| <b>WT fast</b>                 | 0.6123346   | 0.5321565     | 0.9104364 |
| <b>H1-TKO slow</b>             | 0.8846519   | 0.5113616     | 11.65021  |
| <b>H1-TKO medium</b>           | 0.8490443   | 0.4763778     | 9.28557   |
| <b>H1-TKO fast</b>             | 0.7145619   | 0.4918678     | 6.316083  |

(F) H1c and H1d levels and transcription elongation rate categories (**Figure 3B**).

| <b>Distribution statistics</b> | <b>mean</b> | <b>median</b> | <b>SD</b> |
|--------------------------------|-------------|---------------|-----------|
| <b>H1c slow</b>                | 15.85641    | 14.51838      | 18.14094  |
| <b>H1c medium</b>              | 13.59969    | 13.08446      | 4.640742  |
| <b>H1c fast</b>                | 13.62549    | 13.08446      | 4.34269   |
| <b>H1d slow</b>                | 17.18394    | 16.14409      | 19.29534  |
| <b>H1d medium</b>              | 15.49293    | 15.14754      | 3.599277  |
| <b>H1d fast</b>                | 15.50367    | 15.14754      | 3.510373  |

(G) METTL3 levels and transcription elongation rate categories (**Figure 3C**).

| <b>Distribution statistics</b> | <b>mean</b> | <b>median</b> | <b>SD</b> |
|--------------------------------|-------------|---------------|-----------|
| <b>TSS slow</b>                | 135.5698    | 125           | 119.8566  |
| <b>TSS medium</b>              | 139.1475    | 131           | 60.1823   |
| <b>TSS fast</b>                | 142.4269    | 134           | 56.43799  |
| <b>TTS slow</b>                | 85.46481    | 74            | 73.24369  |
| <b>TTS medium</b>              | 84.35304    | 73            | 74.21311  |
| <b>TTS fast</b>                | 83.80666    | 75            | 44.11249  |
