# Supplementary material for: Slow RNAPII Transcription Elongation Rate, Low Levels of RNAPII Pausing, and Elevated Histone H1 Content at Promoters Associate with Higher m6A Deposition on Nascent mRNAs
Source: MDPI journal article supplement (doi:10.3390/genes13091652), 2022-09-14
Supplement: s1 [file s1]

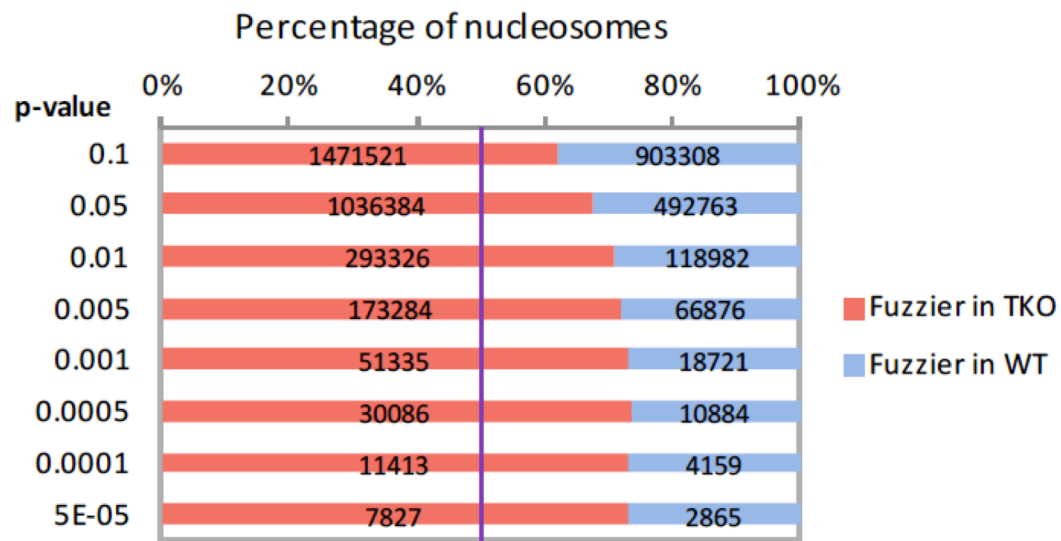

Supplementary Figure S1. Plot showing the number of nucleosomes with increased or decreased positioning (or fuzziness) at different p-values cut-offs in WT and H1-TKO mESCs.
