# Supplementary figures and images for: Slow RNAPII Transcription Elongation Rate, Low Levels of RNAPII Pausing, and Elevated Histone H1 Content at Promoters Associate with Higher m6A Deposition on Nascent mRNAs
Source: MDPI journal article supplement (doi:10.3390/genes13091652), 2022-09-14

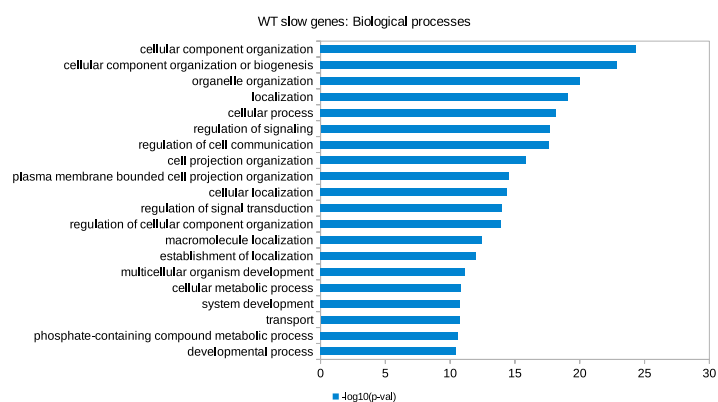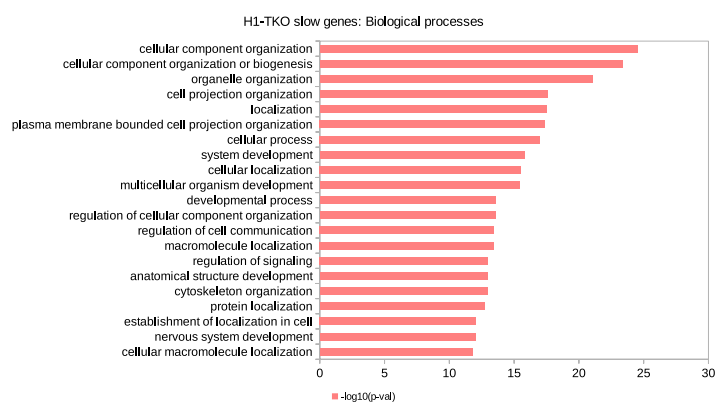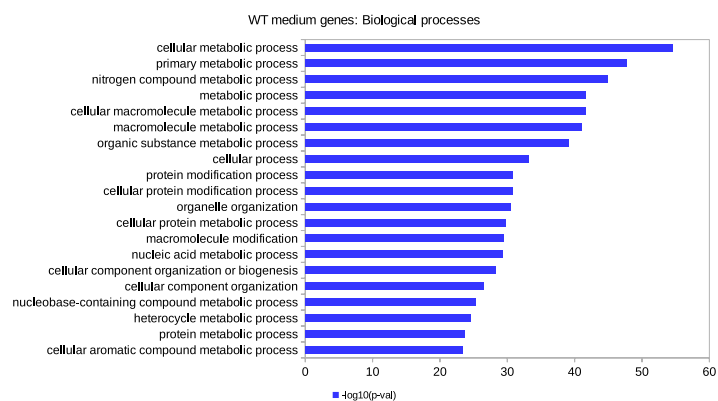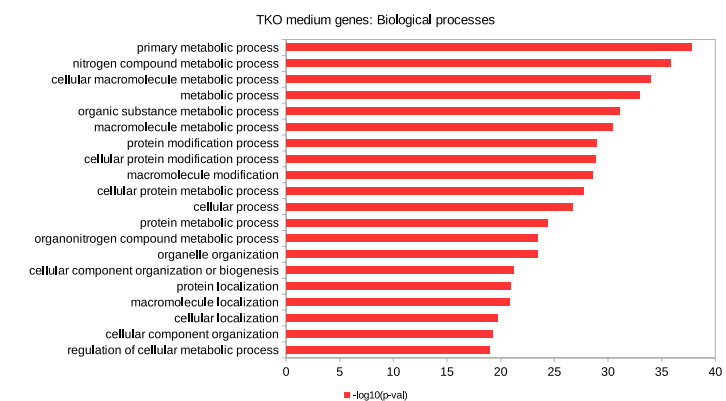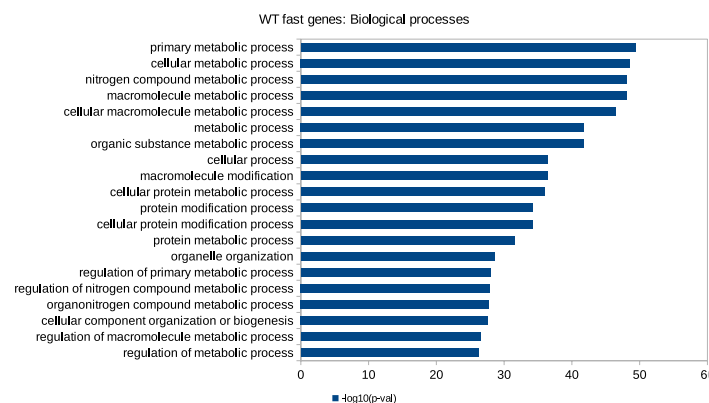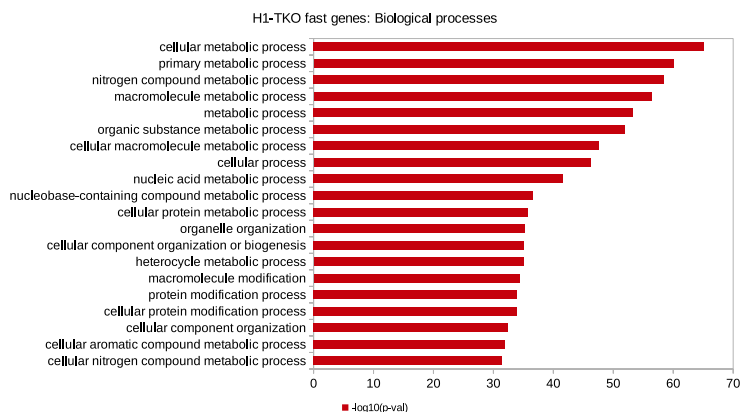

Supplementary Figure S2. Go-terms of the gene-rate groups in WT and H1-TKO mESCs.

Supplement: s1 [file s1]
